# Supplementary material
Source: PubMed Central journal article supplement (PMC10992196)
Supplement: 262_2021_3107_MOESM1_ESM.pdf [file 262_2021_3107_MOESM1_ESM.pdf]

Supplementary table 1. Correlation between different source of PD-L1 in NSCLC

|                      | % PD-L1+ CD4+ |         | % PD-L1+ CD8+ |         | % PD-L1+ CD8+ NK |         | % PD-L1+ CD14+ |         | % PD-L1+ Neutrophils |         | % PD-L1+ PLT |         | % PD-L1+ PMPS |         | sPD-L1 pg/ml |         | % TPS |         |
|----------------------|---------------|---------|---------------|---------|------------------|---------|----------------|---------|----------------------|---------|--------------|---------|---------------|---------|--------------|---------|-------|---------|
|                      | r             | p value | r             | p value | r                | p value | r              | p value | r                    | p value | r            | p value | r             | p value | r            | p value | r     | p value |
| % PD-L1+ CD4+        |               |         | 0,73          | <0,0001 | 0,48             | <0,0001 | 0,37           | <0,0001 | 0,44                 | <0,0001 | 0,13         | 0,26    | -0,07         | 0,52    | 0,11         | 0,22    | -0,03 | 0,80    |
| % PD-L1+ CD8+        | 0,73          | <0,0001 |               |         | 0,50             | <0,0001 | 0,39           | <0,0001 | 0,50                 | <0,0001 | 0,12         | 0,30    | -0,07         | 0,54    | 0,09         | 0,34    | 0,07  | 0,49    |
| % PD-L1+ CD8+ NK     | 0,48          | <0,0001 | 0,49          | <0,0001 |                  |         | 0,34           | <0,0001 | 0,36                 | <0,0001 | 0,31         | 0,006   | 0,04          | 0,76    | 0,08         | 0,37    | 0,07  | 0,50    |
| % PD-L1+ CD14+       | 0,37          | <0,0001 | 0,39          | <0,0001 | 0,34             | <0,0001 |                |         | 0,70                 | <0,0001 | 0,35         | 0,002   | 0,12          | 0,29    | 0,04         | 0,64    | 0,09  | 0,36    |
| % PD-L1+ Neutrophils | 0,44          | <0,0001 | 0,50          | <0,0001 | 0,36             | <0,0001 | 0,70           | <0,0001 |                      |         | 0,17         | 0,13    | -0,08         | 0,49    | 0,15         | 0,11    | 0,12  | 0,25    |
| % PD-L1+ PLT         | 0,13          | 0,25    | 0,12          | 0,29    | 0,31             | 0,006   | 0,35           | 0,001   | 0,17                 | 0,13    |              |         | 0,53          | <0,0001 | -0,07        | 0,58    | -0,17 | 0,16    |
| % PD-L1+ PMPS        | -0,07         | 0,51    | -0,07         | 0,54    | 0,04             | 0,76    | 0,12           | 0,29    | -0,08                | 0,49    | 0,53         | <0,0001 |               |         | -0,12        | 0,30    | -0,14 | 0,22    |
| sPD-L1 pg/ml         | 0,11          | 0,21    | 0,08          | 0,34    | 0,08             | 0,37    | 0,04           | 0,64    | 0,15                 | 0,11    | -0,07        | 0,58    | -0,12         | 0,30    |              |         | 0,06  | 0,57    |
| % TPS                | -0,02         | 0,80    | 0,07          | 0,48    | 0,07             | 0,50    | 0,09           | 0,36    | 0,12                 | 0,25    | -0,17        | 0,16    | -0,14         | 0,22    | 0,06         | 0,57    |       |         |
