# Supplementary material
Source: PubMed Central journal article supplement (PMC10992196)
Supplement: 262_2021_3107_MOESM2_ESM.pdf [file 262_2021_3107_MOESM2_ESM.pdf]

Supplementary table 2. Percentage of PD-L1+ circulating leukocytes, PLTs and PMPs, levels of plasmatic sPD-L1 and PD-L1 TPS according to clinical characteristics

|                      |                | % PD-L1+ CD4+ ; median (IQR) | % PD-L1+ CD8+; median (IQR) | % PD-L1+ CD8+ NK; median (IQR) | % PD-L1+ CD14+; mean ± sem | % PD-L1+ Neutrophils; median (IQR) | % PD-L1+ PLT; median (IQR) | % PD-L1+ PMP; median (IQR) | pg/ml sPD-L1; median (IQR) | % TPS        |
|----------------------|----------------|------------------------------|-----------------------------|--------------------------------|----------------------------|------------------------------------|----------------------------|----------------------------|----------------------------|--------------|
| Gender               | Male           | 2.13 (1.12-4.01)             | 1.76 (0.75-3.77)            | 1.905 (0.86-4.25)              | 38.25 ± 2.39               | 5.82 (2.49-13.8)                   | 9.75 (2.44-21.3)           | 1.375 (0.22-3.95)          | 12.98 (10.5-16.6)          | 15 (0-60)    |
|                      | Female         | 3.16 (1.78-6.27)             | 1.84 (0.73-4.3)             | 1.6 (0.75-3.33)                | 43.31 ± 4.62               | 7.77 (3.83-18.5)                   | 11.5 (3.28-28.4)           | 3.71 (0.32-12.1)           | 9.807 (9.08-12)            | 15 (0-60)    |
|                      | <i>p value</i> | <b>0.03</b>                  | 0.6                         | 0.61                           | 0.32                       | 0.25                               | 0.59                       | 0.15                       | <b>0.005</b>               | 0.82         |
| Smoking status       | Non or Former  | 2.61 (1.14-4.61)             | 1.76 (0.85-3.81)            | 1.99 (0.84-5.16)               | 39.45 ± 2.51               | 6.56 (2.85-15.4)                   | 9.94 (2.74-22.2)           | 1.64 (0.32-4.67)           | 12.04 (9.7-16.6)           | 15 (0-60)    |
|                      | Smoker         | 2.56 (1.29-3.85)             | 1.82 (0.73-3.89)            | 1.73 (0.68-2.62)               | 39.19 ± 3.99               | 5.82 (1.65-11.01)                  | 10.46 (1.56-23.2)          | 1.54 (0.12-4.74)           | 12.04 (9.84-14.57)         | 10 (1-71.25) |
|                      | <i>p value</i> | 0.94                         | 0.51                        | 0.45                           | 0.95                       | 0.38                               | 0.31                       | 0.113                      | 0.94                       | 0.493        |
| Time from diagnosis  | <365           | 2.31 (1.32-3.91)             | 1.89 (1.14-3.46)            | 2.09 (0.93-3.93)               | 42.07 ± 2.61               | 7.77 (2.92-16.9)                   | 10.45 (2.62-24.25)         | 1.55 (0.31-4.26)           | 12.11 (9.9-15.98)          | 17.5 (1-60)  |
|                      | >365           | 3.16 (0.95-6.05)             | 1.02 (0.53-4.28)            | 1.47 (0.64-5.41)               | 34.23 ± 3.55               | 4.93 (2.33-10.95)                  | 5.45 (3.25-19.5)           | 2.35 (0.15-5.6)            | 12.04 (9.63-15.58)         | 10 (0-50)    |
|                      | <i>p value</i> | 0.48                         | 0.08                        | 0.34                           | 0.08                       | 0.06                               | 0.6                        | 0.81                       | 0.84                       | 0.18         |
| Tumor cell histology | Non-squamous   | 2.76 (1.38-4.67)             | 1.64 (0.73-3.92)            | 1.88 (0.89-3.78)               | 38.4 ± 2.45                | 5.93 (2.41-13.73)                  | 9.25 (2.5-25.9)            | 1.46 (0.16-6.11)           | 12.04 (9.72-15.74)         | 17.5 (0-60)  |
|                      | Squamous       | 1.9 (0.92-3.6)               | 1.78 (0.79-3.19)            | 1.53 (0.78-4.4)                | 41.38 ± 4.1                | 7.37 (2.72-15.72)                  | 10.95 (3.19-19.18)         | 2.25 (0.23-3.45)           | 12.04 (9.8-16.58)          | 10 (0-50)    |
|                      | <i>p value</i> | 0.08                         | 0.95                        | 0.89                           | 0.51                       | 0.52                               | 0.79                       | 0.81                       | 0.98                       | 0.43         |
| Treatment line       | 1 st           | 1.82 (0.83-3.88)             | 1.4 (0.62-3.55)             | 1.91 (0.9-3.91)                | 44.85 ± 3.95               | 8.85 (2.69-18.1)                   | 12.9 (2.81-27.15)          | 2.21 (0.32-4.66)           | 11.42 (9.17-15.02)         | 50 (10-80)   |
|                      | 2 nd           | 2.44 (1.6-4.1)               | 1.94 (0.87-3.28)            | 1.73 (0.79-4.38)               | 35.6 ± 2.79                | 6.12 (2.39-14.48)                  | 8.29 (2.61-19.88)          | 1.37 (0.22-4.64)           | 12.5 (10.14-16.64)         | 5 (0-30)     |
|                      | > 3th          | 3.96 (1.39-10.3)             | 2.58 (0.84-5.81)            | 1.85 (0.89-4.21)               | 39.45 ± 5.22               | 5.05 (2.51-11.78)                  | 4.92 (2.21-26.85)          | 1.74 (0.08-9.06)           | 11.88 (10.62-15.15)        | 5 (0-63.75)  |
|                      | <i>p value</i> | <b>0.03</b>                  | 0.25                        | 0.93                           | 0.15                       | 0.57                               | 0.55                       | 0.91                       | 0.24                       | <b>0.001</b> |
| ECOG PS              | 0-1            | 2.58 (1.16-4.62)             | 1.64 (0.66-4.01)            | 1.92 (0.82-4.51)               | 40.63 ± 2.41               | 7.07 (2.41-15.78)                  | 10.95 (2.69-25.35)         | 1.72 (0.32-4.79)           | 12.04 (9.69-15.61)         | 15 (0-60)    |
|                      | 2              | 2.47 (1.43-3.71)             | 2.13 (1.34-3.17)            | 1.66 (0.91-3.32)               | 33.18 ± 3.99               | 6.12 (3.29-8.54)                   | 9.25 (1.85-13.25)          | 1.46 (0.09-3.51)           | 12.11 (11.35-17.12)        | 10 (0-60)    |
|                      | <i>p value</i> | 0.94                         | 0.29                        | 0.54                           | 0.19                       | 0.66                               | 0.31                       | 0.44                       | 0.34                       | 0.32         |
